# Supplementary material for: Functional Conservation and Genetic Divergence of Chordate Glycinergic Neurotransmission: Insights from Amphioxus Glycine Transporters
Source: Preprints.org preprint supplement (doi:10.20944/preprints202110.0348.v1), 2021-10-25
Supplement: Supplementary file 1 [file supplementary]

**Table S1.** PCR conditions, primers and amplicon length of *Branchiostoma lanceolatum* genes cloned in this study. bp: base pairs.

| Gene           | Forward primer/Reverse primer                                    | Length  | Annealing temperature |
|----------------|------------------------------------------------------------------|---------|-----------------------|
| <i>GlyT</i>    | 5'-ACAACGCCTGGAACACCGAGAACT-3'<br>5'-GAAGAAGGCCAGGACCATCAGAGA-3' | 911 bp  | 54°C                  |
| <i>GlyT2.1</i> | 5'-TCCCCTACCTCGCTTACCAAAATG-3'<br>5'-AGGCGGCAGACAGGGAGTAGAAGA-3' | 825 bp  | 58°C                  |
| <i>GlyT2.2</i> | 5'-CGGCGGAGGTGCGTTTTTGAT-3'<br>5'-GAGGGGGTAGGTGCCAGCGTAAGA-3'    | 1159 bp | 59°C                  |
| <i>VGAT</i>    | 5'-GGTCCAGTGTTTGTACGAGGA-3'<br>5'-GATCCCACCTTCAGCTTCATGT-3'      | 947 bp  | 54°C                  |

Each primer set is listed as forward primer in the first and reverse primer in the second line. Each PCR reaction was carried out with 35 thermal cycles.

**Table S2.** Multiple sequence alignment of amphioxus glycine transporter proteins. Bbelcheri: *Branchiostoma belcheri*; Bfloridae: *Branchiostoma floridae*; Blanceolatum: *Branchiostoma lanceolatum*.

|                            | 1     |                                                                                                                     | 115 |
|----------------------------|-------|---------------------------------------------------------------------------------------------------------------------|-----|
| Bfloridae GlyT             | (1)   | -----MESNGDI--RDMKREASIPLSVQTDG-----EEEFERDFAKNGRGQWGAKLDFMLSMGYCVGLGNVWRFPYLCYRNGGGAFLIPYLLFITFA                   |     |
| Blanceolatum GlyT          | (1)   | -----MESNGDI--IKDMKREASIPLSVQDEE-----EEEFERDFAANRGQWGAKLDFMLSMGYCVGLGNVWRFPYLCYRNGGGAFLIPYLLFITFA                   |     |
| Bbelcheri GlyTisoformX1    | (1)   | -----MESN-----GEMKREASIPLSVQTHE-----EEEFERDFAKNGRGQWGAKLDFMLSMGYCVGLGNVWRFPYLCYRNGGGAFLIPYLLFITFA                   |     |
| Bbelcheri GlyTisoformX2    | (1)   | -----                                                                                                               |     |
| Bbelcheri GlyTisoformX3    | (1)   | -----                                                                                                               |     |
| Bfloridae GlyT2.1isoformX1 | (1)   | -----MTGDTPMAGNEQPTLEKQLDPDGNVYKFENG-----SVAVEDDGDENKERGNWSNKLDFILSCVGYAVGLGNVWRFPYLAYQNGGGAFLVPYITIMLACA           |     |
| Bfloridae GlyT2.1isoformX2 | (1)   | -----MTGDTPMAGNEQPTLEKQLDPDGNVYKFENG-----SVAVEDDGDENKERGNWSNKLDFILSCVGYAVGLGNVWRFPYLAYQNGGGAFLVPYITIMLACA           |     |
| Blanceolatum GlyT2.1       | (1)   | -----MTGDTP-----NEQPTLEKQLDPDGNVYKFENG-----SVAVEDDGDENKERGNWSNKLDFILSCVGYAVGLGNVWRFPYLAYQNGGGAFLVPYITIMLACA         |     |
| Bbelcheri GlyT2.1isoformX1 | (1)   | -----MTGDTPMAGNEQPTLEKQLDPDGNVYKFENG-----SVAVEDDGDENKERGNWSNKLDFILSCVGYAVGLGNVWRFPYLAYQNGGGAFLVPYITIMLACA           |     |
| Bbelcheri GlyT2.1isoformX2 | (1)   | -----MTGDTPMAGNEQPTLEKQLDPDGNVYKFENG-----SVAVEDDGDENKERGNWSNKLDFILSCVGYAVGLGNVWRFPYLAYQNGGGAFLVPYITIMLACA           |     |
| Bfloridae GlyT2.1isoformX3 | (1)   | -----MTGDTPMAGNEQPTLEKQLDPDGNVYKFENG-----SVAVEDDGDENKERGNWSNKLDFILSCVGYAVGLGNVWRFPYLAYQNGGGAFLVPYITIMLACA           |     |
| Bfloridae GlyT2.2          | (1)   | -----MDNPALQAGDAGNYNATNEPYTNRDGKWKLSYDPEPNAVSQMDIVEDDGDENKERGNWSNKLDFILSCVGYAVGLGNVWRFPYLAYENGGGAFLIPYITIMLVFA      |     |
| Blanceolatum GlyT2.2       | (1)   | -----MDNPGLQDAGAAYNATNEPYTARDGKWKLSYDPEPNAVSQMDIVEDDGDENKERGNWSNKLDFILSCVGYAVGLGNVWRFPYLAYENGGGAFLIPYITIMLVFA       |     |
| Bbelcheri GlyT2.2isoformX1 | (1)   | MVTTTMTTTSIPMGNTTDEKQPLPNGPPQYTSRDKGKWKLSYDPEPNAVSQMDIVEDDGDENKERGNWSNKLDFILSCVGYAVGLGNVWRFPYLAYENGGGAFLIPYITIMLVFA |     |
| Bbelcheri GlyT2.2isoformX3 | (1)   | -----MDFPDENVSLLEAERLAKYTSRDKGKWKLSYDPEPNAVSQMDIVEDDGDENKERGNWSNKLDFILSCVGYAVGLGNVWRFPYLAYENGGGAFLIPYITIMLVFA       |     |
| Bbelcheri GlyT2.2isoformX2 | (1)   | -----MDNPGLQAGEAGNYNATNEPYTSRDKGKWKLSYDPEPNAVSQMDIVEDDGDENKERGNWSNKLDFILSCVGYAVGLGNVWRFPYLAYENGGGAFLIPYITIMLVFA     |     |
|                            | 116   |                                                                                                                     | 230 |
| Bfloridae GlyT             | (91)  | GLPIFMMEMSFQGYGSLGPIITIWRACPPIFKGIGYGMVVVSGLVCIYYNVIIAWTIHLFLFSSTFSAALPWASCDNAWNTENTLAAN-----                       |     |
| Blanceolatum GlyT          | (91)  | GLPIFMMEMSFQGYGSLGPIITIWRACPPIFKGIGYGMVVVSGLVCIYYNVIIAWTIHLFLFSSTFSAALPWATCDNAWNTENTLAAN-----                       |     |
| Bbelcheri GlyTisoformX1    | (87)  | GLPIFMMEMSFQGYGSLGPIITIWRACPPIFKGIGYGMVVVSGLVCIYYNVIIAWTIHLFLFSSTFSAALPWASCDNPWNTENTLAAN-----                       |     |
| Bbelcheri GlyTisoformX2    | (1)   | -----MPMCTTGIGYGMVVVSGLVCIYYNVIIAWTIHLFLFSSTFSAALPWASCDNPWNTENTLAAN-----                                            |     |
| Bbelcheri GlyTisoformX3    | (1)   | -----MPMCTTG-----IGYGMVVVSGLVCIYYNVIIAWTIHLFLFSSTFSAALPWASCDNPWNTENTLAAN-----                                       |     |
| Bfloridae GlyT2.1isoformX1 | (94)  | GLPIFFLELAYGQFSSQGGPVGVWKAIPLLQGVGVCMVCVSFLVGIYYNVIIAYALFYLFASFTSYLPWSDCNPNWNTPECATKDACQQTVNATFQNTILGGEMYSMFGLYDENG |     |
| Bfloridae GlyT2.1isoformX2 | (94)  | GLPIFFLELAYGQFSSQGGPVGVWKAIPLLQGVGVCMVCVSFLVGIYYNVIIAYALFYLFASFTSYLPWSDCNPNWNTPECATK-ACQQTVNATFQNTILGGEMYSMFGLYDENG |     |
| Blanceolatum GlyT2.1       | (91)  | GLPIFFLELAYGQFSSQGGPVGVWKAIPLLQGVGVCMVCVSFLVGIYYNVIIAYALFYLFASFTSYLPWSDCNPNWNTPGCATK-ACQQTVNATFQNTILGGEMYSMFGMYDENG |     |
| Bbelcheri GlyT2.1isoformX1 | (94)  | GLPIFFLELAYGQFSSQGGPVGVWKAIPLLQGVGVCMVCVSFLVGIYYNVIIAYALFYLFASFTSYLPWSDCNPNWNTPECATKDACQQTVNATFQNTILGGELYSMFGLYDENG |     |
| Bbelcheri GlyT2.1isoformX2 | (94)  | GLPIFFLELAYGQFSSQGGPVGVWKAIPLLQGVGVCMVCVSFLVGIYYNVIIAYALFYLFASFTSYLPWSDCNPNWNTPECATK-ACQQTVNATFQNTILGGELYSMFGLYDENG |     |
| Bfloridae GlyT2.1isoformX3 | (94)  | GLPIFFLELAYGQFSSQGGPVGVWKAIPLLQGVGVCMVCVSFLVGIYYNVIIAYALFYLFASFTSYLPWSDCNPNWNTPECATKDACQQTVNATFQNTILGGEMYSMFGLYDENG |     |
| Bfloridae GlyT2.2          | (104) | GLPIFLELTSLGQFASQGGPIRVWRCLPLFGQIGYTVQVIASALVGIYYNCIIAYTLFYLFSSFTSDLPWRICDNTWNTGDCVDT-----NSLAN                     |     |
| Blanceolatum GlyT2.2       | (104) | GLPIFLELTSLGQFASQGGPIRVWRCLPLFGQIGYTVQVIASALVGIYYNCIIAYTLFYLFSSFTSDLPWRICDNTWNTADCVDT-----NSLAN                     |     |
| Bbelcheri GlyT2.2isoformX1 | (116) | GLPIFLELTSLGQFASQGGPIRVWRCLPLFGQIGYTVQVIASALVGIYYNCIIAYTLFYLFSSFTSDLPWRICDNTWNTGDCVDT-----NSLKN                     |     |
| Bbelcheri GlyT2.2isoformX3 | (103) | GLPIFLELTSLGQFASQGGPIRVWRCLPLFGQIGYTVQVIASALVGIYYNCIIAYTLFYLFSSFTSDLPWRICDNTWNTGDCVDT-----NSLKN                     |     |
| Bbelcheri GlyT2.2isoformX2 | (104) | GLPIFLELTSLGQFASQGGPIRVWRCLPLFGQIGYTVQVIASALVGIYYNCIIAYTLFYLFSSFTSDLPWRICDNTWNTGDCVDT-----NSLKN                     |     |
|                            | 231   |                                                                                                                     | 345 |
| Bfloridae GlyT             | (176) | --HSALEENVTRISPTQEYWNRRVLGISAGIEETGTQWELALCLLGAWVVVFCLFKGKISSGKVVFYFATFPYVMLLIVLFLRGVLTLEGAGKGLVYYLTFDFSRLADSQVWYDA |     |
| Blanceolatum GlyT          | (176) | --HSALEENVTRISPTQEYWNRRVLGISAGIEETGTQWELALCLLGAWVVVFCLFKGKISSGKVVFYFATFPYVMLLIVLFLRGVLTLEGAGKGLVYYLTFDFSRLADSQVWYDA |     |
| Bbelcheri GlyTisoformX1    | (172) | --HSALEENVTRISPTQEYWNRRVLGISAGIEETGTQWELALCLLGAWVVVFCLFKGKISSGKVVFYFATFPYVMLLIVLFLRGVLTLEGAGKGLVYYLTFDFSRLADSQVWYDA |     |
| Bbelcheri GlyTisoformX2    | (64)  | --HSALEENVTRISPTQEYWNRRVLGISAGIEETGTQWELALCLLGAWVVVFCLFKGKISSGKVVFYFATFPYVMLLIVLFLRGVLTLEGAGKGLVYYLTFDFSRLADSQVWYDA |     |
| Bbelcheri GlyTisoformX3    | (62)  | --HSALEENVTRISPTQEYWNRRVLGISAGIEETGTQWELALCLLGAWVVVFCLFKGKISSGKVVFYFATFPYVMLLIVLFLRGVLTLEGAGKGLVYYLTFDFSRLADSQVWYDA |     |
| Bfloridae GlyT2.1isoformX1 | (209) | VVNGTYCGDKGRTPSEDYWNHYALEITPGIHEPGGKIKWQALSLVLAWVIVFSLCKGKISSGKVVFYFATFPYFVLVILLIVGVLDQGHLDGVLFFITPKWERLKEAKVWKDA   |     |
| Bfloridae GlyT2.1isoformX2 | (208) | VVNGTYCGDKGRTPSEDYWNHYALEITPGIHEPGGKIKWQALSLVLAWVIVFSLCKGKISSGKVVFYFATFPYFVLVILLIVGVLDQGHLDGVLFFITPKWERLKEAKVWKDA   |     |
| Blanceolatum GlyT2.1       | (205) | VVNGTYCGDKMRTPSEDYWNHYALEITPGIHEPGGKIKWQALSLVLAWVIVFSSMCKGKISSGKVVFYFATFPYFVLVILLIVGVLDQGHLDGVLFFITPKWERLKEAKVWKDA  |     |
| Bbelcheri GlyT2.1isoformX1 | (209) | VVNGTFCGNKEKTPSEDYWNHYALEITPGIHEPGGKIKWQALSLVLAWVIVFSLCKGKISSGKVVFYFATFPYFVLVILLIVGVLDQGHLDGVLFFITPKWERLKEAKVWKDA   |     |
| Bbelcheri GlyT2.1isoformX2 | (208) | VVNGTFCGNKEKTPSEDYWNHYALEITPGIHEPGGKIKWQALSLVLAWVIVFSLCKGKISSGKVVFYFATFPYFVLVILLIVGVLDQGHLDGVLFFITPKWERLKEAKVWKDA   |     |
| Bfloridae GlyT2.1isoformX3 | (209) | VVNGTYCGDKGRTPSEDYWNHYALEITPGIHEPGGKIKWQALSLVLAWVIVFSLCKGKISSGKVVFYFATFPYFVLVILLIVGVLDQGHLDGVLFFITPKWERLKEAKVWKDA   |     |
| Bfloridae GlyT2.2          | (192) | WT-G--N-LSDRVSPSEYYWDRYMLSRSGIGEPVTVKKQALCELLAWIVVYFSLIKGKISSGKVVFYFATFPYVLLILLIRGVTLTGALGKIFFIVPKWSQIANAKVWKDA     |     |
| Blanceolatum GlyT2.2       | (192) | WT-G--N-LSDRVSPSEYYWDRYMLSRSGIGEPVTVKKQALCELLAWIVVYFSLIKGKISSGKVVFYFATFPYVLLILLIRGVTLTGALGKIFFIVPKWSQIANAKVWKDA     |     |
| Bbelcheri GlyT2.2isoformX1 | (204) | WT-G--N-ISDRVSPSEYYWDRYMLSRSGIGEPVTVKKQALCELLAWIVVYFSLIKGKISSGKVVFYFATFPYVLLILLIRGVTLTGALGKIFFIVPKWSQIANAKVWKDA     |     |
| Bbelcheri GlyT2.2isoformX3 | (191) | WT-G--N-ISDRVSPSEYYWDRYMLSRSGIGEPVTVKKQALCELLAWIVVYFSLIKGKISSGKVVFYFATFPYVLLILLIRGVTLTGALGKIFFIVPKWSQIANAKVWKDA     |     |
| Bbelcheri GlyT2.2isoformX2 | (192) | WT-G--N-ISDRVSPSEYYWDRYMLSRSGIGEPVTVKKQALCELLAWIVVYFSLIKGKISSGKVVFYFATFPYVLLILLIRGVTLTGALGKIFFIVPKWSQIANAKVWKDA     |     |

|                            |       |                                                                           |                                                                                 |                                    |                                |                       |                       |                   |                   |           |      |
|----------------------------|-------|---------------------------------------------------------------------------|---------------------------------------------------------------------------------|------------------------------------|--------------------------------|-----------------------|-----------------------|-------------------|-------------------|-----------|------|
|                            |       | 346                                                                       |                                                                                 | 460                                |                                |                       |                       |                   |                   |           |      |
| Bfloridae GlyT             | (289) | ASQIFYSLGIAFGGTQVMASYNKFNNTNRD                                            | SVFTALSNCTSVFAGVVVFSILGHMAHKLDMVDKDVVANGPGLVFFVAYPEALTLLPVAPLWSVLFFFMIFFTVGLD   | TFVMLET                            |                                |                       |                       |                   |                   |           |      |
| Blanceolatum GlyT          | (289) | ASQIFYSLGIAFGGTQVMASYNKFNNTNRD                                            | SVFTALSNCTSVFAGVVVFSILGHMAHKLDMVDKDVVANGPGLVFFVAYPEALTLLPVAPLWSVLFFFMIFFTVGLD   | TFVMLET                            |                                |                       |                       |                   |                   |           |      |
| Bbelcheri GlyTisoformX1    | (285) | ASQIFYSLGIAFGGTQVMASYNKFNNTNRD                                            | SVFTALSNCTSVFAGVVVFSILGHMAHKLDMVDKDVVANGPGLVFFVAYPEALTLLPVAPLWSVLFFFMIFFTVGLD   | TFVMLET                            |                                |                       |                       |                   |                   |           |      |
| Bbelcheri GlyTisoformX2    | (177) | ASQIFYSLGIAFGGTQVMASYNKFNNTNRD                                            | SVFTALSNCTSVFAGVVVFSILGHMAHKLDMVDKDVVANGPGLVFFVAYPEALTLLPVAPLWSVLFFFMIFFTVGLD   | TFVMLET                            |                                |                       |                       |                   |                   |           |      |
| Bbelcheri GlyTisoformX3    | (175) | ASQIFYSLGIAFGGTQVMASYNKFNNTNRD                                            | SVFTALSNCTSVFAGVVVFSILGHMAHKLDMVDKDVVANGPGLVFFVAYPEALTLLPVAPLWSVLFFFMIFFTVGLD   | TFVMLET                            |                                |                       |                       |                   |                   |           |      |
| Bfloridae GlyT2.1isoformX1 | (324) | ATQIFYSLSAAWGGLITMASYNRFQNNCYKDTLIVSLMNCSTSI                              | FAGFVIFSI                                                                       | LGFMAKQIGVDVDDVAASGPGLAFTIAYPEALT  | KLVPVFIWAILFFFLMLTLGLD         | TQFAIET               |                       |                   |                   |           |      |
| Bfloridae GlyT2.1isoformX2 | (323) | ATQIFYSLSAAWGGLITMASYNRFQNNCYKDTLIVSLMNCSTSI                              | FAGFVIFSI                                                                       | LGFMAKQIGVDVDDVAASGPGLAFTIAYPEALT  | KLVPVFIWAILFFFLMLTLGLD         | TQFAIET               |                       |                   |                   |           |      |
| Blanceolatum GlyT2.1       | (320) | ATQIFYSLSAAWGGLITMASYNRFQNNCYKDTLIVSLMNCSTSI                              | FAGFVIFSI                                                                       | LGFMAKQIGVDVDDVAASGPGLAFTIAYPEALT  | KLVPVFIWAILFFFLMLTLGLD         | TQFAIET               |                       |                   |                   |           |      |
| Bbelcheri GlyT2.1isoformX1 | (324) | ATQIFYSLSAAWGGLITMASYNRFQNNCYKDTLIVSLMNCSTSI                              | FAGFVIFSI                                                                       | LGFMAKQIGVDVDDVAASGPGLAFTIAYPEALT  | KLVPVFIWAILFFFLMLTLGLD         | TQFAIET               |                       |                   |                   |           |      |
| Bbelcheri GlyT2.1isoformX2 | (323) | ATQIFYSLSAAWGGLITMASYNRFQNNCYKDTLIVSLMNCSTSI                              | FAGFVIFSI                                                                       | LGFMAKQIGVDVDDVAASGPGLAFTIAYPEALT  | KLVPVFIWAILFFFLMLTLGLD         | TQFAIET               |                       |                   |                   |           |      |
| Bfloridae GlyT2.1isoformX3 | (324) | ATQIFYSLSAAWGGLITMASYNRFQNNCYKDTLIVSLMNCSTSI                              | FAGFVIFSI                                                                       | LGFMAKQIGVDVDDVAASGPGLAFTIAYPEALT  | KLVPVFIWAILFFFLMLTLGLD         | TQFAIET               |                       |                   |                   |           |      |
| Bfloridae GlyT2.2          | (303) | AAQIFFSLSAAWGGLLTLASYNKFNNTIHDALIVALTNCATS                                | VFAGFVIFSI                                                                      | LGHMAKLINVTIPEVAKSGFGLAFVAYPEALT   | LLPVSPFLWAILFFFLMLFTLGLD       | SQFTIVET              |                       |                   |                   |           |      |
| Blanceolatum GlyT2.2       | (303) | AAQIFFSLSAAWGGLLTLASYNKFNNTIHDALIVALTNCATS                                | VFAGFVIFSI                                                                      | LGHMAKLINVTIPEVAKSGFGLAFVAYPEALT   | LLPVSPFLWAILFFFLMLFTLGLD       | SQFTIVET              |                       |                   |                   |           |      |
| Bbelcheri GlyT2.2isoformX1 | (315) | AAQIFFSLSAAWGGLLTLASYNKFNNTIHDALIVALTNCATS                                | VFAGFVIFSI                                                                      | LGHMAKLINVTIPEVAKSGFGLAFVAYPEALT   | LLPVSPFLWAILFFFLMLFTLGLD       | SQFTIVET              |                       |                   |                   |           |      |
| Bbelcheri GlyT2.2isoformX3 | (302) | AAQIFFSLSAAWGGLLTLASYNKFNNTIHDALIVALTNCATS                                | VFAGFVIFSI                                                                      | LGHMAKLINVTIPEVAKSGFGLAFVAYPEALT   | LLPVSPFLWAILFFFLMLFTLGLD       | SQFTIVET              |                       |                   |                   |           |      |
| Bbelcheri Glyt2.2isoformX2 | (303) | AAQIFFSLSAAWGGLLTLASYNKFNNTIHDALIVALTNCATS                                | VFAGFVIFSI                                                                      | LGHMAKLINVTIPEVAKSGFGLAFVAYPEALT   | LLPVSPFLWAILFFFLMLFTLGLD       | SQFTIVET              |                       |                   |                   |           |      |
|                            |       | 461                                                                       |                                                                                 | 575                                |                                |                       |                       |                   |                   |           |      |
| Bfloridae GlyT             | (404) | CITGICDEFFPHIMQ-KYKTWVLLVSVVMYFLGLTCVTNAGMYWLNLMDWYSAGFSLMVLAFFMCAISVWYGF | QRCCKNVQEMIGYQPNYYFKICWAVISPMVLLFIVVFSMVV                                       |                                    |                                |                       |                       |                   |                   |           |      |
| Blanceolatum GlyT          | (404) | CITGICDEFFPHIMQ-KYKTWVLLVSVVMYFLGLTCVTNAGMYWLNLMDWYSAGFSLMVLAFFMCAISVWYGF | QRCCKNVQEMIGYQPNYYFKICWAVISPMVLLFIVVFSMVV                                       |                                    |                                |                       |                       |                   |                   |           |      |
| Bbelcheri GlyTisoformX1    | (400) | CITGICDEFFPHIMQ-KYKTWVLLVSVVMYFLGLTCVTNAGMYWLNLMDWYSAGFSLMVLAFFMCAISVWYGF | QRCCKNVQEMIGYQPNYYFKICWAVISPMVLLFIVVFSMVV                                       |                                    |                                |                       |                       |                   |                   |           |      |
| Bbelcheri GlyTisoformX2    | (292) | CITGICDEFFPHIMQ-KYKTWVLLVSVVMYFLGLTCVTNAGMYWLNLMDWYSAGFSLMVLAFFMCAISVWYGF | QRCCKNVQEMIGYQPNYYFKICWAVISPMVLLFIVVFSMVV                                       |                                    |                                |                       |                       |                   |                   |           |      |
| Bbelcheri GlyTisoformX3    | (290) | CITGICDEFFPHIMQ-KYKTWVLLVSVVMYFLGLTCVTNAGMYWLNLMDWYSAGFSLMVLAFFMCAISVWYGF | QRCCKNVQEMIGYQPNYYFKICWAVISPMVLLFIVVFSMVV                                       |                                    |                                |                       |                       |                   |                   |           |      |
| Bfloridae GlyT2.1isoformX1 | (439) | VVTTTCDDT                                                                 | FKIGHAGIKKTLSTLGFCLVMEFLGLLGVTRSGLYWVNLIDNFAASYSLMVIAITEMLGISWVYGINNFCRDIEMMVGF | KPGWYWKATWAVIS                     | SPGLLIFIFIFSLVE                |                       |                       |                   |                   |           |      |
| Bfloridae GlyT2.1isoformX2 | (438) | VVTTTCDDT                                                                 | FKIGHAGIKKTLSTLGFCLVMEFLGLLGVTRSGLYWVNLIDNFAASYSLMVIAITEMLGISWVYGINNFCRDIEMMVGF | KPGWYWKATWAVIS                     | SPGLLIFIFIFSLVE                |                       |                       |                   |                   |           |      |
| Blanceolatum GlyT2.1       | (435) | VVTTTCDDT                                                                 | FKIGHAGIKKTLSTLGFCLVMEFLGLLGVTRSGLYWVNLIDNFAASYSLMVIAITEMLGISWVYGINNFCRDIEMMVGF | KPGWYWKATWAVIS                     | SPGLLIFIFIFSLVE                |                       |                       |                   |                   |           |      |
| Bbelcheri GlyT2.1isoformX1 | (439) | VVTTTCDDT                                                                 | FKIGHAGIKKTLSTLGFCLVMEFLGLLGVTRSGLYWVNLIDNFAASYSLMVIAITEMLGISWVYGINNFCRDIEMMVGF | KPGWYWKATWAVIS                     | SPGLLIFIFIFSLVE                |                       |                       |                   |                   |           |      |
| Bbelcheri GlyT2.1isoformX2 | (438) | VVTTTCDDT                                                                 | FKIGHAGIKKTLSTLGFCLVMEFLGLLGVTRSGLYWVNLIDNFAASYSLMVIAITEMLGISWVYGINNFCRDIEMMVGF | KPGWYWKATWAVIS                     | SPGLLIFIFIFSLVE                |                       |                       |                   |                   |           |      |
| Bfloridae GlyT2.1isoformX3 | (439) | VVTTTCDDT                                                                 | FKIGHAGIKKTLSTLGFCLVMEFLGLLGVTRSGLYWVNLIDNFAASYSLMVIAITEMLGISWVYGINNFCRDIEMMVGF | KPGWYWKATWAVIS                     | SPGLLIFIFIFSLVE                |                       |                       |                   |                   |           |      |
| Bfloridae GlyT2.2          | (418) | VATAICD                                                                   | GWPTLLR-QKKWLVMCLTAVCCYLLAMPCLTHAGIYHVQLIDS                                     | SYAGTYPLIIIVAIMECIGISYLYGLRRFCKDIA | MMAGYQPNYYWQANWAFITPALITFVLIFS | SFVF                  |                       |                   |                   |           |      |
| Blanceolatum GlyT2.2       | (418) | VATAICD                                                                   | GWPTLLR-QKKWLVMCLTAVCCYLLAMPCLTHAGIYHVQLIDS                                     | SYAGTYPLIIIVAIMECIGISYLYGLRRFCKDIA | MMAGYQPNYYWQANWAFITPALITFVLIFS | SFVF                  |                       |                   |                   |           |      |
| Bbelcheri GlyT2.2isoformX1 | (430) | VATAICD                                                                   | GWPTLLR-QKKWLVMCLTAVCCYLLAMPCLTHAGIYHVQLIDS                                     | SYAGTYPLIIIVAIMECIGISYLYGLRRFCKDIA | MMAGYQPNYYWQANWAFITPALITFVLIFS | SFVF                  |                       |                   |                   |           |      |
| Bbelcheri GlyT2.2isoformX3 | (417) | VATAICD                                                                   | GWPTLLR-QKKWLVMCLTAVCCYLLAMPCLTHAGIYHVQLIDS                                     | SYAGTYPLIIIVAIMECIGISYLYGLRRFCKDIA | MMAGYQPNYYWQANWAFITPALITFVLIFS | SFVF                  |                       |                   |                   |           |      |
| Bbelcheri GlyT2.2isoformX2 | (418) | VATAICD                                                                   | GWPTLLR-QKKWLVMCLTAVCCYLLAMPCLTHAGIYHVQLIDS                                     | SYAGTYPLIIIVAIMECIGISYLYGLRRFCKDIA | MMAGYQPNYYWQANWAFITPALITFVLIFS | SFVF                  |                       |                   |                   |           |      |
|                            |       | 576                                                                       |                                                                                 | 678                                |                                |                       |                       |                   |                   |           |      |
| Bfloridae GlyT             | (518) | HVPAYYGP-YQYP                                                             | NAICIGWFMALLSIIMVPLFVLAIIKAKG-SFMERLR                                           | YACESSDDWGPA                       | LVNASATSSQ---SDEAEKKI          | PLEDTEGKGS            | STYISTI               |                   |                   |           |      |
| Blanceolatum GlyT          | (518) | HVPAYYGS-YQYP                                                             | GWAVCIGWLMALLSIIMVPLFVLAIIKAKG-SFMERLR                                          | YACESSDNWGPA                       | LVNASATSSQSD-DEQEKV            | PLRDTEGND             | NSYISTI               |                   |                   |           |      |
| Bbelcheri GlyTisoformX1    | (514) | HVPAYYGD-YQYP                                                             | GWACIGWFMALLSIIMVPLFAVLAIIKAKG-SFMERLR                                          | YACESSDDWGPA                       | LVSTSSAESSQS---EPEKKV          | PLQDTEGTG             | NSYISTI               |                   |                   |           |      |
| Bbelcheri GlyTisoformX2    | (406) | HVPAYYGD-YQYP                                                             | GWACIGWFMALLSIIMVPLFAVLAIIKAKG-SFMERLR                                          | YACESSDDWGPA                       | LVSTSSAESSQS---EPEKKV          | PLQDTEGTG             | NSYISTI               |                   |                   |           |      |
| Bbelcheri GlyTisoformX3    | (404) | HVPAYYGD-YQYP                                                             | GWACIGWFMALLSIIMVPLFAVLAIIKAKG-SFMERLR                                          | YACESSDDWGPA                       | LVSTSSAESSQS---EPEKKV          | PLQDTEGTG             | NSYISTI               |                   |                   |           |      |
| Bfloridae GlyT2.1isoformX1 | (554) | YKPPPLNETYI                                                               | YPGWSQAIAWLMVLSGTIWI                                                            | PVIAIYRVVTS                        | PGDTFMERLR                     | LFACKPAPDWGPYLNQHRALD | PERYKPKP              | PSKQIVNDPYADIGTKI | ----              |           |      |
| Bfloridae GlyT2.1isoformX2 | (553) | YKPPPLNETYI                                                               | YPGWSQAIAWLMVLSGTIWI                                                            | PVIAIYRVVTS                        | PGDTFMERLR                     | LFACKPAPDWGPYLNQHRALD | PERYKPKP              | PSKQIVNDPYADIGTKI | ----              |           |      |
| Blanceolatum GlyT2.1       | (550) | YTPPLNDTYI                                                                | YPGWSQAVAWLMVLEGTIWI                                                            | PAIAIYRI                           | AVSPGDTFMERLR                  | LFACKPAPDWGPYLNQHRALD | SERYKPKP              | PSKQIVNDPYADVGT   | TKI               |           |      |
| Bbelcheri GlyT2.1isoformX1 | (554) | YKAPPLNDTYI                                                               | YPGWSQAIAWLMVLEGTIWI                                                            | PAIAIYRI                           | VTS                            | PGDTFMERLR            | LFACKPAPDWGPYLNQHRALD | SERYQAKP          | PSKQIVNDPYADIGTKI | ----      |      |
| Bbelcheri GlyT2.1isoformX2 | (553) | YKAPPLNDTYI                                                               | YPGWSQAIAWLMVLEGTIWI                                                            | PAIAIYRI                           | VTS                            | PGDTFMERLR            | LFACKPAPDWGPYLNQHRALD | SERYQAKP          | PSKQIVNDPYADIGTKI | ----      |      |
| Bfloridae GlyT2.1isoformX3 | (554) | YKPPPLNETYI                                                               | YPGWSQAIAWLMVLSGTIWI                                                            | PVIAIYRVVTS                        | PGDTFMERLR                     | LFACKPAPDWGPYLNQYRAH  | -----                 | -----             | -----             | -----     |      |
| Bfloridae GlyT2.2          | (532) | HEDVSYGD-YEYPL                                                            | WAVTLGNLILVFCAIWI                                                               | PGVAIFWLV                          | ITPG-SFMERLR                   | LRKVTSP               | TTTWGPHLPQHR          | ---               | DERYANMANPSQGI    | GAKYTPNDG | GTKL |
| Blanceolatum GlyT2.2       | (532) | HEDVSYGD-YEYPL                                                            | WAVTLGNLILVFCAIWI                                                               | PGVAIFWLV                          | ITPG-SFMERLR                   | LRKVTSP               | TTTWGPHLARHR          | ---               | DERYAHMANPSSGI    | GAKYTPNDG | GTKL |
| Bbelcheri GlyT2.2isoformX1 | (544) | HEDVSYGD-YTYPL                                                            | WAVTLGNLILVFCAIWI                                                               | PGVAIFWLV                          | ITPG-SFMERLR                   | LRKVTSP               | TTTWGPHLPQHR          | ---               | DERYANMANPSAGI    | GAKYTPNDG | GTKL |
| Bbelcheri GlyT2.2isoformX3 | (531) | HEDVSYGD-YTYPL                                                            | WAVTLGNLILVFCAIWI                                                               | PGVAIFWLV                          | ITPG-SFMERLR                   | LRKVTSP               | TTTWGPHLPQHR          | ---               | DERYANMANPSAGI    | GAKYTPNDG | GTKL |
| Bbelcheri GlyT2.2isoformX2 | (532) | HEDVSYGD-YTYPL                                                            | WAVTLGNLILVFCAIWI                                                               | PGVAIFWLV                          | ITPG-SFMERLR                   | LRKVTSP               | TTTWGPHLPQHR          | ---               | DERYANMANPSAGI    | GAKYTPNDG | GTKL |

Identical amino acid residues conserved in 100% of the sequences are shown in yellow, similar amino acid residues conserved in less than 100% but more than 50% of the sequences are shown in light blue, and similar amino acid residues conserved in less than 50% of sequences are highlighted in green.
